# Supplementary material for: CD70 drives cSCC growth by linking DNA damage response, inflammation, and tumor–stromal signaling
Source: Research Square preprint supplement (doi:10.21203/rs.3.rs-8206807/v1), 2025-12-12
Supplement: Supplementary file 2 [file de21fbad9913c557b5501058.docx]

**Supplementary Figure Legends**

**Figure S1. The expression of CXCL13 in sun exposed skin and non-melanoma skin cancers.** CXCL13 expression is significantly lower in sun-exposed skin compared with sun-protected skin (left panel) but is markedly elevated in AK and cSCC compared with normal controls (right panel). Statistical analysis was performed using the Wilcoxon rank-sum test (****p* < 0.001).

**Figure S2. DNA damage response mediates CD70 expression *via* E2F1. (A)** Treatment of HaCaT cells with DNA-damaging agents (CPT, ETP, or APH) for 24 h enhances CD70 expression. **(B)** The potential transcription factors identified from TFs-JASPAR, TFs-PROMO, and the Human TFDB overlapped with GOBP_DNA_DAMAGE_RESPONSE from GSEA MSigDB. This analysis identified E2F1 and TP53 as potential transcription factors mediating CD70.Correlation analysis of merged GEO datasets reveals a negative association between CD70 and TP53 expression. **(C)** E2F1 expression is markedly elevated in AK and cSCC compared with normal controls. Statistical analysis was performed using Wilcoxon rank-sum test (****p* < 0.001). Knockdown of E2F1 significantly decreases CD70 expression **(D)** and suppresses growth **(E)** in A431 and SCC12 cells. Asterisks indicate statistical significance (**p* < 0.05; ****p* < 0.001 vs. shCon; Student’s *t*-test).

**Figure S3. Knockdown of E2F1 suppresses SSL-induced CD70 expression in HaCaT cells.** HaCaT cells expressing shCon or shE2F1 were generated, and E2F1 and CD70 expression was assessed by immunofluorescence (upper panels). Scale bar: 50 μm. Fluorescence intensity was quantified using ZEISS ZEN 3.7 (lower panels). Statistical significance was determined by one-way ANOVA with Tukey’s HSD (****p* < 0.001).

**Figure S4. Knockdown of CD70 mediates cytokine-cytokine receptor interaction and MAPK signaling pathways.** KEGG analysis highlights cytokine–cytokine receptor interaction and MAPK signaling as the most altered pathways (see Figure 4C). Heatmap analysis shows the detailed gene expression changes in the cytokine–cytokine receptor interaction **(A)** and MAPK signaling pathways **(B)**. To validate these results, CD70 knockdown results in decreased *IL1B* expression, one of the common genes shared by both pathways, as determined by RT-qPCR in SSL-exposed HaCaT cells **(C)** and A431 cells **(D)**. Asterisks indicate statistical significance (**p* < 0.05; ***p* < 0.001 vs. shCon; Student’s *t*-test).

**Figure S5. Knockdown of CD70 suppresses NF-κB nuclear translocation in keratinocytes and cSCC cells.** HaCaT and A431 cells expressing shCon or shCD70 were established. IF staining showed that CD70 knockdown reduces SSL-induced NF-κB nuclear translocation in HaCaT cells and TPA-induced NF-κB nuclear translocation in A431 cells (upper panels). Scale bar: 50 μm. Nuclear fluorescence intensity was quantified using ZEISS ZEN 3.7 (lower panels). Data are presented as mean values ± SE. Statistical significance was determined by one-way ANOVA with Tukey’s HSD (****p* < 0.001).

**Figure S6. Conditioned medium (CM) from CD70-silenced fibroblasts suppresses cSCC cell growth. (A)** MTT assay showing that CM from NHDF1-TGFβ shCon fibroblasts enhance A431 cell growth, whereas CM from NHDF1-TGFβ shCD70 fibroblasts suppresses A431 growth compared with shCon CM. **(B)** Similar results were observed in SCC12 cells. Here CM from NHDF1-TGFβ shCon fibroblasts promotes growth while CM from NHDF1-TGFβ shCD70 fibroblasts suppresses growth. Data are presented as means ± SE, with statistical significance determined by Student’s *t*-test (****p* < 0.001 vs. NHDF1-TGFβ shCon CM).

**Figure S7. CD70 mediates cytokine secretion from NHDF1-TGFβ fibroblasts.** Cytokine levels in conditioned medium (CM) from NHDF1-TGFβ fibroblasts expressing shCD70 or shCon were assessed using a human cytokine array. Spot intensities were quantified using ImageJ, and cytokine expression levels are presented in graphical form. IL-6 and MCP-3 are two examples of cytokines that were markedly altered between shCD70 and shCon fibroblasts, highlighting CD70’s role in regulating pro-inflammatory cytokine secretion.
